# Supplementary material for: A Morphometric Approach to Understand Prokaryoplankton: A Study in the Sicily Channel (Central Mediterranean Sea)
Source: MDPI journal article supplement (doi:10.3390/microorganisms11041019), 2023-04-13
Supplement: s1 [file s1]

Table S1. Acronyms of the studied parameters

|                  |                               |
|------------------|-------------------------------|
| T°C              | temperature                   |
| S                | salinity                      |
| DO               | dissolved oxygen              |
| DEN              | density                       |
| FLUO             | fluorescence                  |
| NO <sub>3</sub>  | nitrates                      |
| PO <sub>4</sub>  | phosphates                    |
| SiO <sub>4</sub> | silicates                     |
| Chl <i>a</i>     | chlorophyll <i>a</i>          |
| PA               | prokaryotic abundance         |
| PB               | prokaryotic biomass           |
| VOL              | cell volume                   |
| CCC              | cell carbon content           |
| VA               | virus-like particle abundance |
| VPR              | virus to prokaryote ratio     |
