# Supplementary material for: A Morphometric Approach to Understand Prokaryoplankton: A Study in the Sicily Channel (Central Mediterranean Sea)
Source: MDPI journal article supplement (doi:10.3390/microorganisms11041019), 2023-04-13
Supplement: s1 [file s1]

Table S2. Ranges of variation, means and standard deviations of prokaryotic cell volume (VOL), cell carbon content (CCC), prokaryotic abundance (PA), prokaryotic biomass (PB) and virus –like particle abundance (VA).

|                     | <i>VOL</i>      | <i>CCC</i>              | <i>PA</i>                               | <i>PB</i>              | <i>VA</i>                              |
|---------------------|-----------------|-------------------------|-----------------------------------------|------------------------|----------------------------------------|
|                     | $\mu\text{m}^3$ | fg C cell <sup>-1</sup> | cell x 10 <sup>6</sup> ml <sup>-1</sup> | $\mu\text{g C l}^{-1}$ | VLP x 10 <sup>5</sup> ml <sup>-1</sup> |
| <i>BANSIC-2012</i>  |                 |                         |                                         |                        |                                        |
| min                 | 0.017           | 0.6                     | 0.55                                    | 24.9                   | 0.42                                   |
| max                 | 2.12            | 416,0                   | 1.95                                    | 113.08                 | 2.83                                   |
| mean                | 0.17            | 45.6                    | 1.21                                    | 54.45                  | 1.68                                   |
| sd                  | 0.156           | 35.1                    | .40                                     | 20.65                  | 0.72                                   |
| <i>n</i>            | 4573            | 4573                    | 29                                      | 29                     | 29                                     |
| <i>NOVESAR-2013</i> |                 |                         |                                         |                        |                                        |
| min                 | 0.012           | 4.7                     | 0.25                                    | 4.8                    | n.d.                                   |
| max                 | 0.536           | 127.3                   | 1.06                                    | 14.38                  | n.d.                                   |
| mean                | 0.06            | 18.7                    | 0.51                                    | 8.51                   | n.d.                                   |
| sd                  | 0.052           | 13.4                    | 0.23                                    | 3.34                   | n.d.                                   |
| <i>n</i>            | 1344            | 1344                    | 14                                      | 14                     |                                        |
| <i>BANSIC-2013</i>  |                 |                         |                                         |                        |                                        |
| min                 | 0.005           | 2.3                     | 0.63                                    | 12.09                  | 0.18                                   |
| max                 | 2.42            | 467,0                   | 1.76                                    | 62.68                  | 1.57                                   |
| mean                | 0.103           | 29.6                    | 1.09                                    | 32.86                  | 0.74                                   |
| sd                  | 0.118           | 26.8                    | 0.31                                    | 14.95                  | 0.31                                   |
| <i>n</i>            | 2852            | 2852                    | 16                                      | 16                     | 16                                     |
