# Supplementary material for: A Morphometric Approach to Understand Prokaryoplankton: A Study in the Sicily Channel (Central Mediterranean Sea)
Source: MDPI journal article supplement (doi:10.3390/microorganisms11041019), 2023-04-13
Supplement: s1 [file s1]

Table S3. Average Cell Carbon Content (CCC) determined for each station and depth.

| BANSIC 2012 |       |                         | NOVESAR 2013 |       |                         | BANSIC 2013 |       |                         |
|-------------|-------|-------------------------|--------------|-------|-------------------------|-------------|-------|-------------------------|
| Station     | Depth | fg C cell <sup>-1</sup> | Station      | Depth | fg C cell <sup>-1</sup> | Station     | Depth | fg C cell <sup>-1</sup> |
| <b>22</b>   | 1     | 65.3                    | <b>22</b>    | 1     | 16.8                    | <b>22</b>   | 0     | 48.2                    |
|             | 25    | 53.7                    |              | 25    | 18.2                    |             | 9     | 51.2                    |
|             | 45    | 58.1                    |              | 45    | 18.5                    |             | 25    | 42.3                    |
|             | 56    | 47.1                    |              | 56    | 18.4                    |             | 65    | 35.6                    |
| <b>143</b>  | 1     | 56.0                    | <b>137</b>   | 10    | 15.0                    | <b>140</b>  | 0     | 24.5                    |
|             | 25    | 36.9                    |              | 25    | 13.6                    |             | 9     | 26.4                    |
|             | 50    | 46.4                    |              | 60    | 18.5                    |             | 25    | 23.7                    |
|             | 70    | 55.9                    |              | 70    | 16.8                    |             | 70    | 22.9                    |
|             | 100   | 57.7                    |              | 87    | 16.9                    |             |       |                         |
| <b>137</b>  | 1     | 52.5                    | <b>188</b>   | 1     | 20.9                    | <b>641</b>  | 0     | 20.9                    |
|             | 25    | 48.8                    |              | 25    | 17.8                    |             | 15    | 22.1                    |
|             | 60    | 47.9                    |              | 50    | 24.3                    |             | 25    | 31.0                    |
|             | 70    | 48.7                    |              | 70    | 23.4                    |             | 75    | 24.9                    |
|             | 83    | 35.2                    |              | 91    | 22.3                    |             |       |                         |
| <b>188</b>  | 2     | 56.5                    |              |       |                         | <b>302</b>  | 0     | 31.0                    |
|             | 25    | 50.8                    |              |       |                         |             | 8     | 25.1                    |
|             | 50    | 42.2                    |              |       |                         |             | 25    | 24.0                    |
|             | 70    | 37.2                    |              |       |                         |             | 68    | 28.7                    |
|             | 89    | 38.0                    |              |       |                         |             |       |                         |
| <b>302</b>  | 1     | 42.0                    |              |       |                         |             |       |                         |
|             | 25    | 35.1                    |              |       |                         |             |       |                         |
|             | 50    | 38.0                    |              |       |                         |             |       |                         |
|             | 70    | 37.1                    |              |       |                         |             |       |                         |
|             | 102   | 36.8                    |              |       |                         |             |       |                         |
| <b>641</b>  | 1     | 51.5                    |              |       |                         |             |       |                         |
|             | 25    | 36.7                    |              |       |                         |             |       |                         |
|             | 50    | 32.9                    |              |       |                         |             |       |                         |
|             | 70    | 34.6                    |              |       |                         |             |       |                         |
|             | 95    | 34.2                    |              |       |                         |             |       |                         |
